# Supplementary material for: Tunable d-band center of a NiFeMo alloy with enlarged lattice strain enhancing the intrinsic catalytic activity for overall water-splitting
Source: Royal Society of Chemistry journal article supplement (doi:10.1039/d2nr07150a), 2023-01-01
Supplement: d2nr07150a3.pdf [file d2nr07150a3.pdf]

## **Supporting Information**

**Tunable d-band center of NiFeMo alloy with enlarged lattice strain enhancing intrinsic catalytic activity for overall water-splitting**

Kewen Ma<sup>a</sup>, Xueru Chang<sup>a</sup>, Zehua Wang<sup>a</sup>, Renchao Deng<sup>a</sup>, Xiao Wu<sup>a</sup>, Hao Yang\*

<sup>a</sup>Guangxi Key Laboratory of Electrochemical Energy Materials, School of Chemistry & Chemical Engineering, Guangxi University, Nanning, 530004, China.

Prof. Hao Yang

Guangxi Key Laboratory of Electrochemical Energy Materials, School of Chemistry & Chemical Engineering, Guangxi University, Nanning, 530004, China

Email: yanghao@gxu.edu.cn

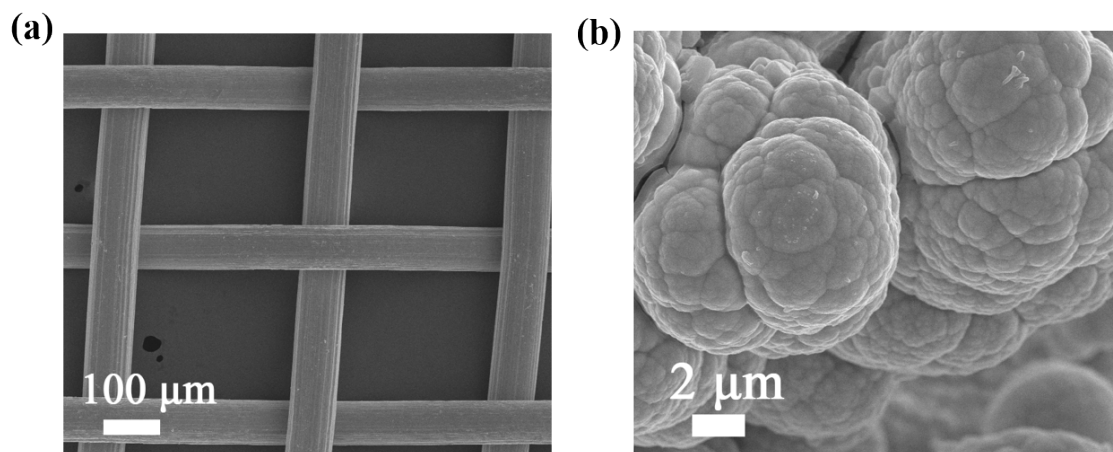

**Fig. S1.** (a) Scanning electron microscopy (SEM) images of (a) Blank SSM (b) NiFeMo/SSM at further magnification.

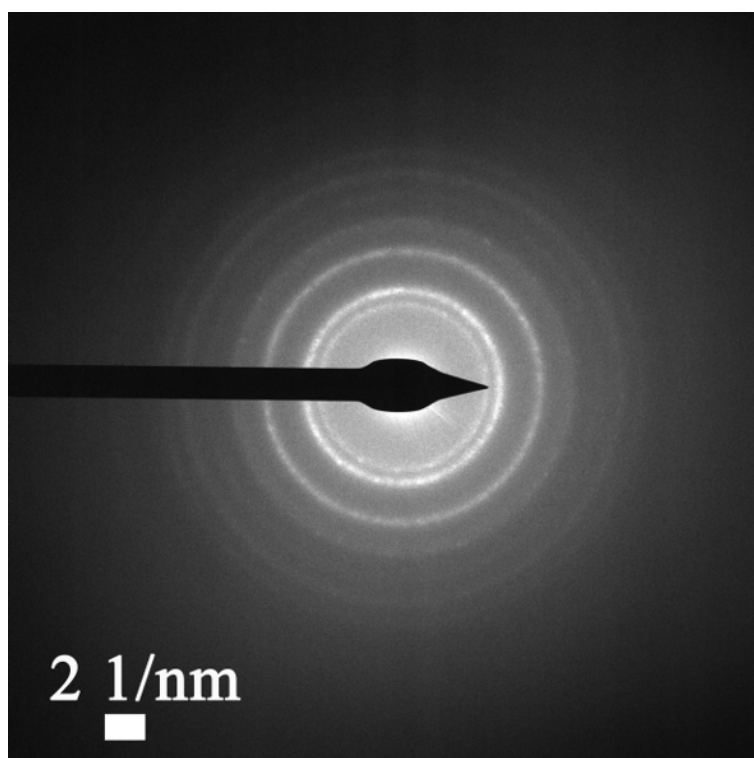

**Fig. S2.** SAED pattern of NiFeMo/SSM.

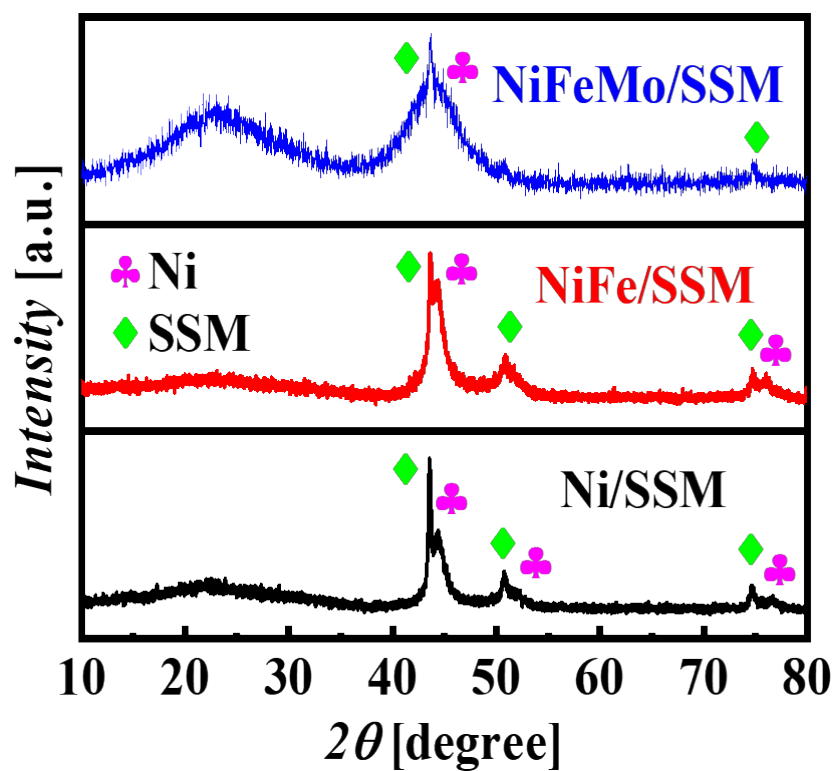

**Fig. S3.** XRD patterns of Ni/SSM, NiFe/SSM, NiFeMo/SSM.

**Table S1.** The content of each metal in the catalyst.

| Sample     | Elements | Atomic Percentage (At%) |
|------------|----------|-------------------------|
| NiFe/SSM   | Ni       | 92.98                   |
|            | Fe       | 6.61                    |
| NiMo/SSM   | Ni       | 94.89                   |
|            | Mo       | 4.62                    |
| NiFeMo/SSM | Ni       | 91.99                   |
|            | Fe       | 4.27                    |
|            | Mo       | 3.02                    |

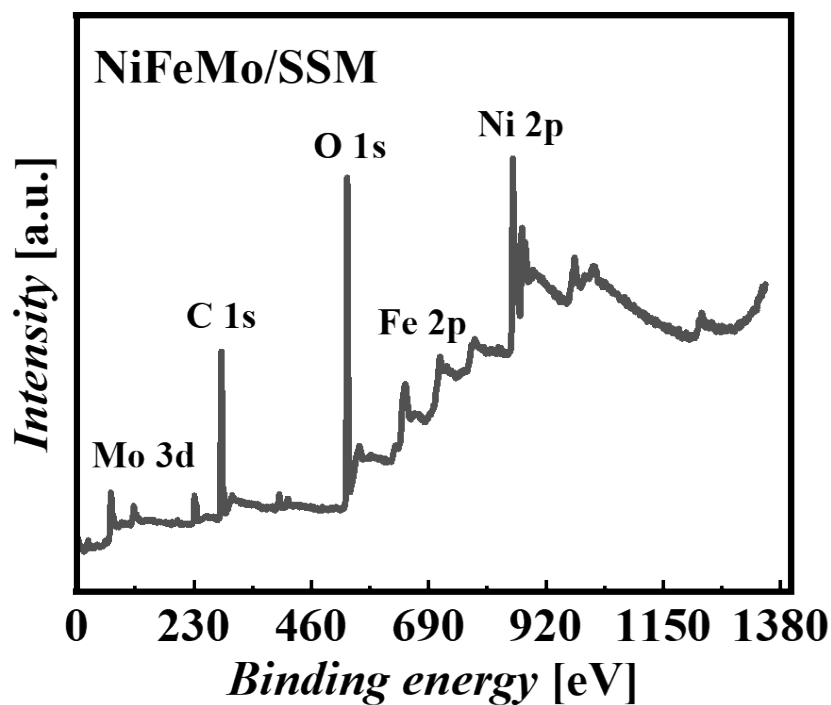

**Fig. S4.** XPS survey spectra of NiFeMo/SSM.

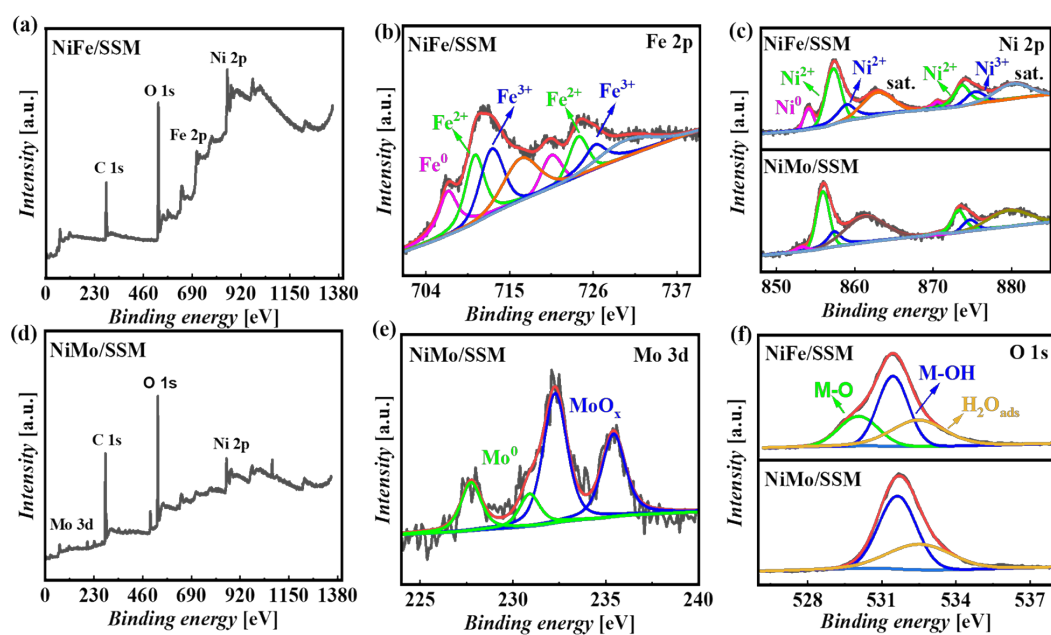

**Fig. S5.** (a) XPS survey spectra of NiFe/SSM, (b) Fe 2p of NiFe/SSM, (c) Ni 2p of NiFe/SSM and NiMo/SSM, (d) XPS survey spectra of NiMo/SSM, (e) Mo 3d of NiMo/SSM, (f) O 1s of NiFe/SSM and NiMo/SSM.

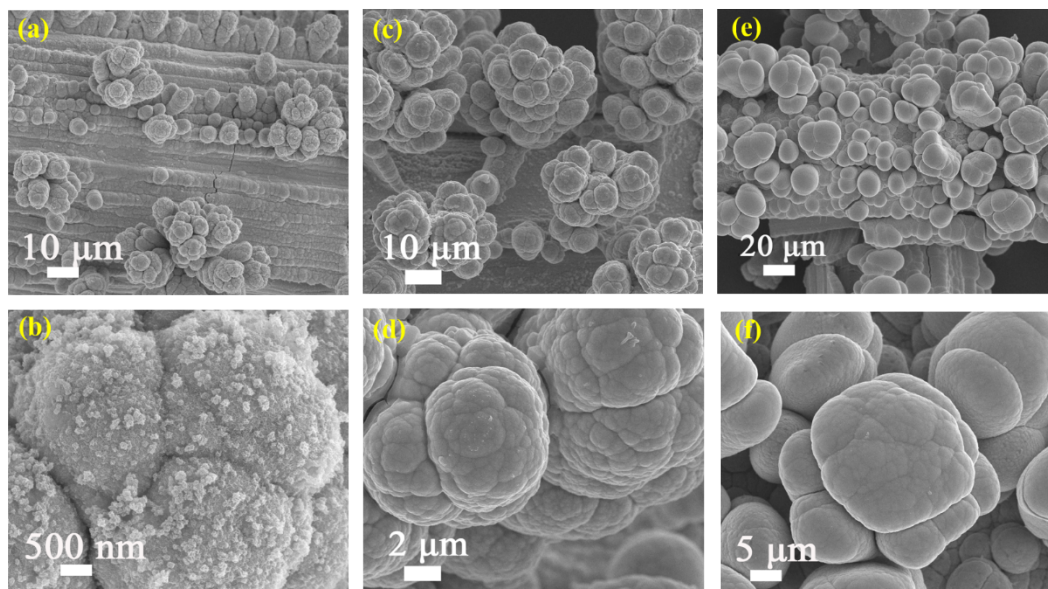

**Fig. S6.** SEM images with the different magnification of (a) and (b) NiFeMo-(10 mM Mo), (c) and (d) NiFeMo-(20 mM Mo), (e) and (f) NiFeMo-(40 mM Mo).

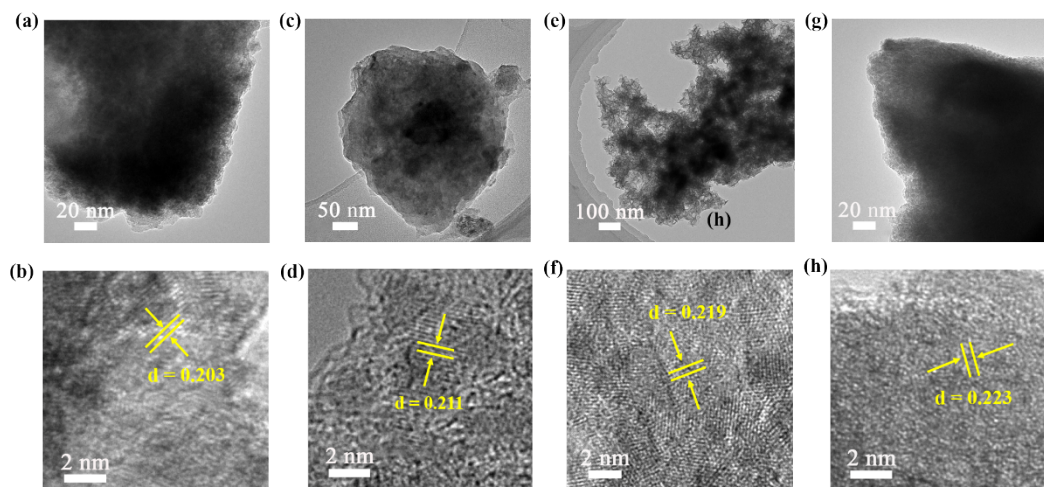

**Fig. S7.** TEM and HRTEM images of (a-b) Ni, (c-d) NiFeMo-(10 mM Mo), (e-f) NiFeMo-(20 mM Mo), (g-h) NiFeMo-(40 mM Mo).

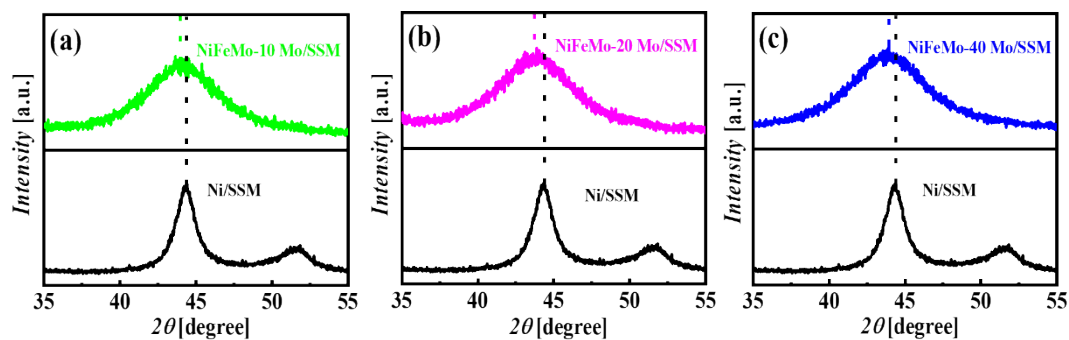

**Fig. S8.** XRD patterns of (a) Ni and NiFeMo-(10 mM Mo), (b) Ni and NiFeMo-(20 mM Mo), (c) Ni and NiFeMo-(40 mM Mo).

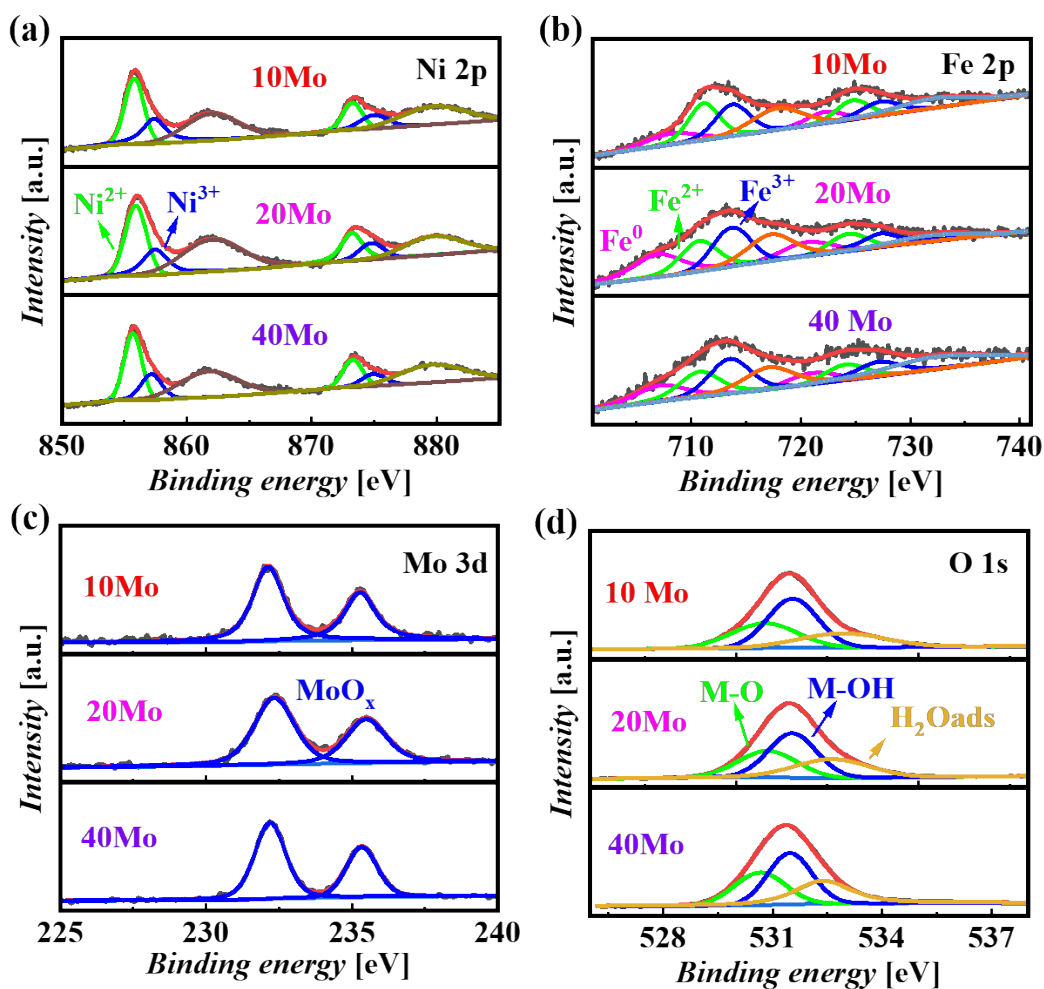

**Fig. S9.** Comparative chemical structures of NiFeMo-(10 mM Mo), NiFeMo-(20 mM Mo), NiFeMo-(40 mM Mo). a) Ni 2p, b) Fe 2p, c) Mo 3d and d) O1s.

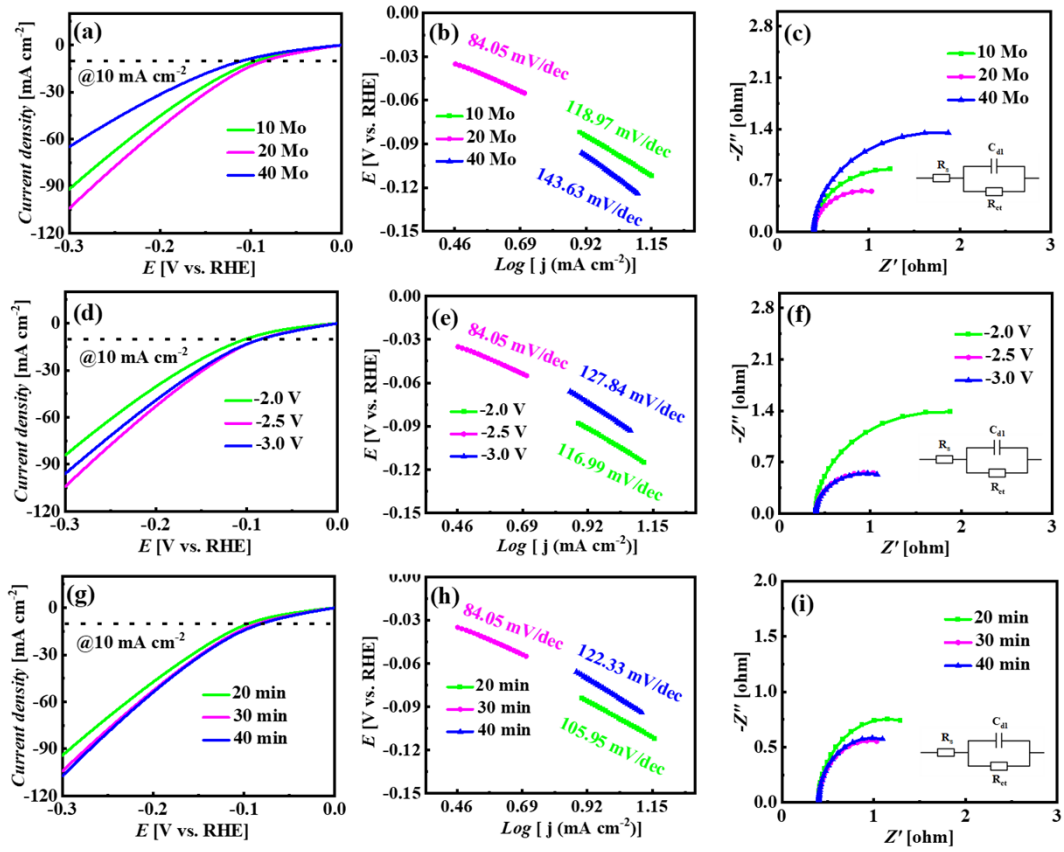

**Fig. S10.** LSV curve, Tafel plots, and Nyquist plot for different deposition conditions for HER.



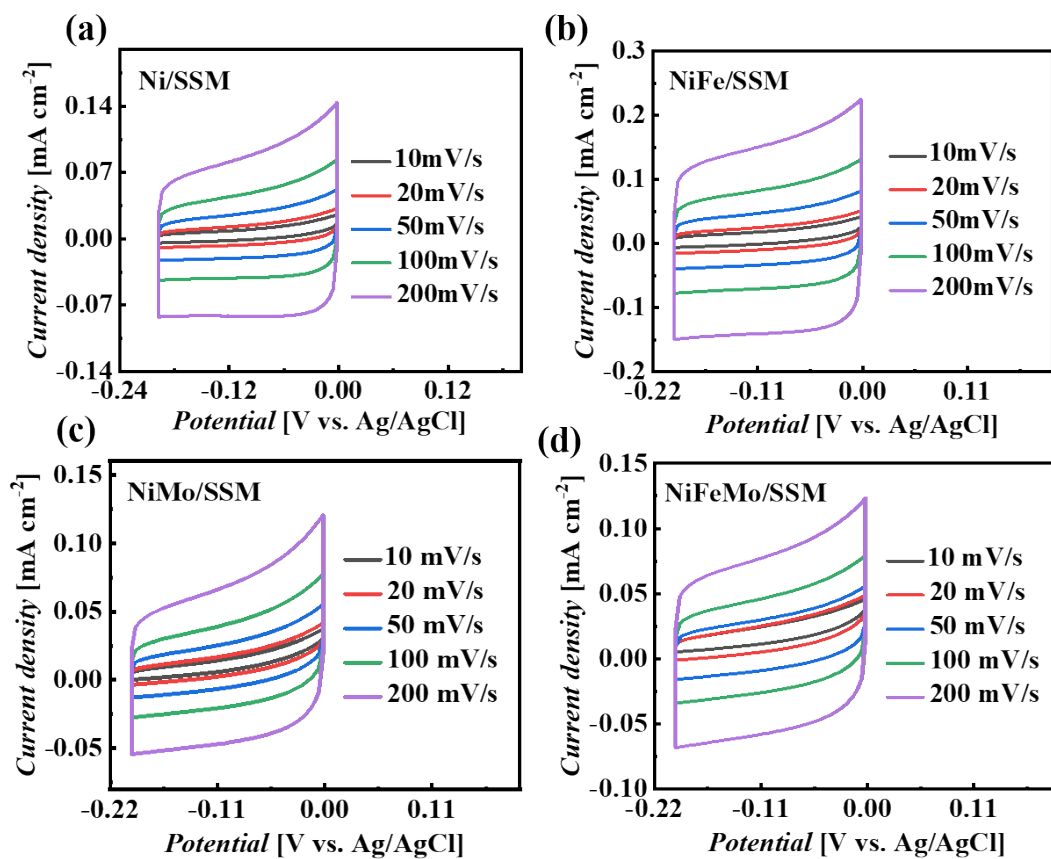

**Fig. S11.** Cyclic voltammograms within the potential range where no faradaic reaction occurred on (a) Ni/SSM, (b) NiFe/SSM, (c) NiMo/SSM, (d) NiFeMo/SSM.

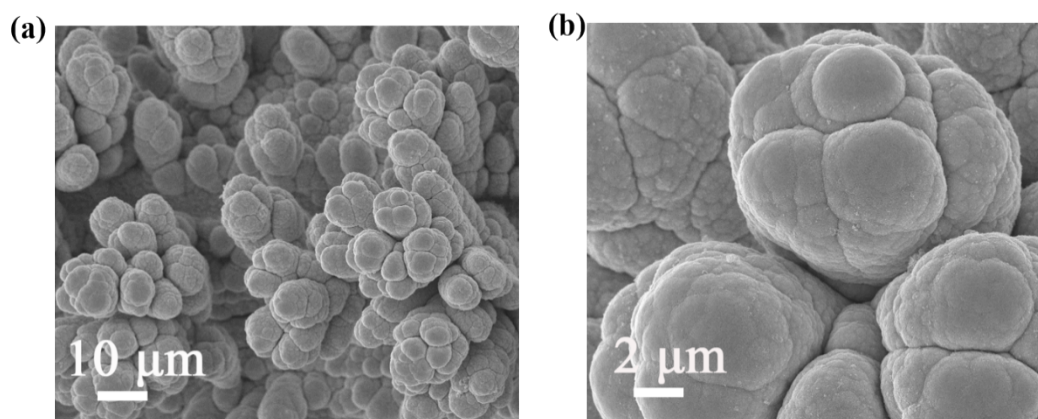

**Fig. S12.** SEM images of NiFeMo/SSM after HER test.



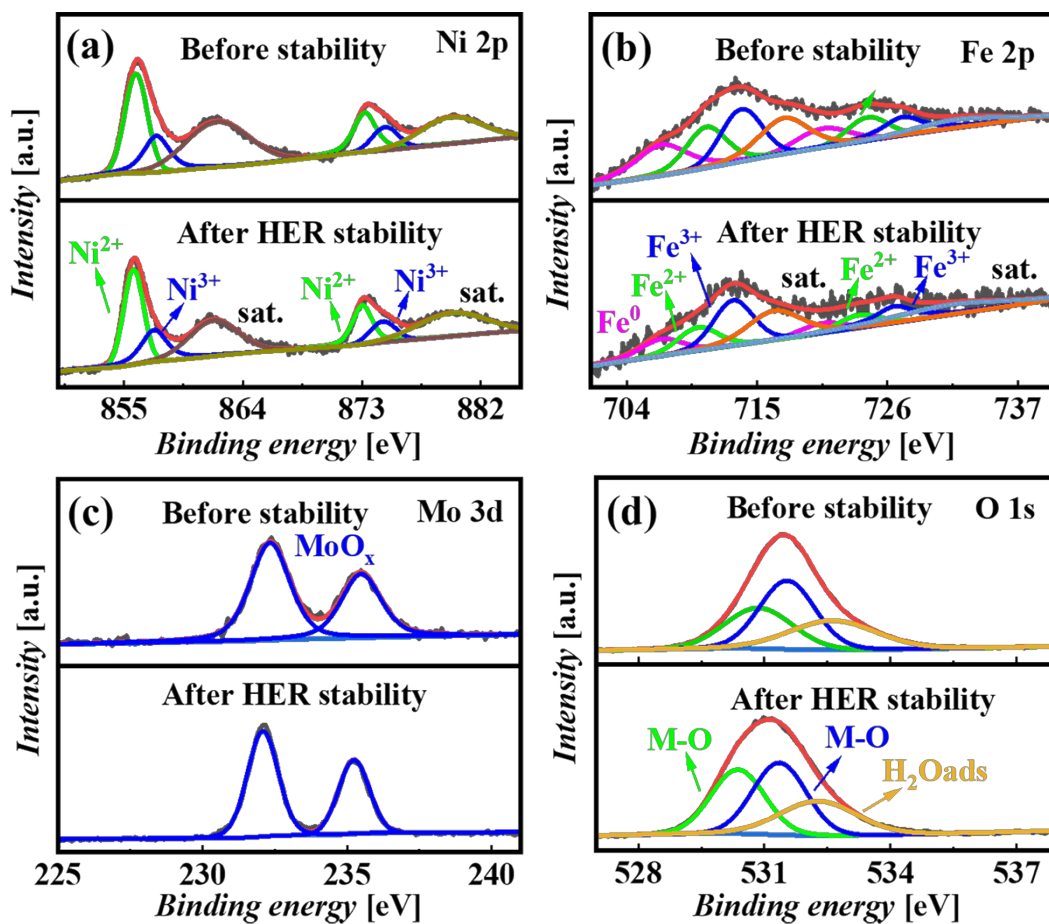

**Fig. S13.** (a) XPS spectra of Ni 2p of NiFeMo/SSM before and after HER stability test. (b) XPS spectra of Fe 2p of NiFeMo/SSM before and after HER test. (c) XPS spectra of Mo 3d of NiFeMo/SSM before and after HER test. (d) XPS spectra of O 1s of NiFeMo/SSM before and after HER test. (top panel for before test, bottom panel for after HER).

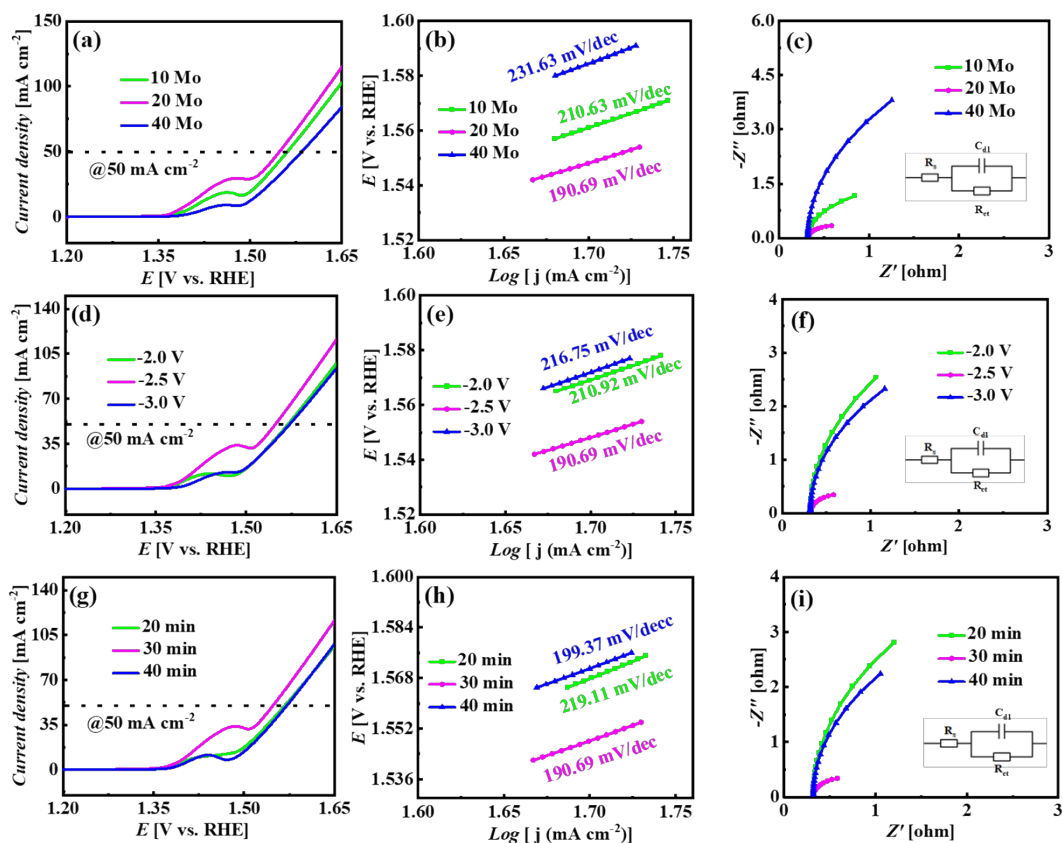

**Fig. S14.** LSV curve, Tafel plots, and Nyquist plot for different deposition conditions for OER.

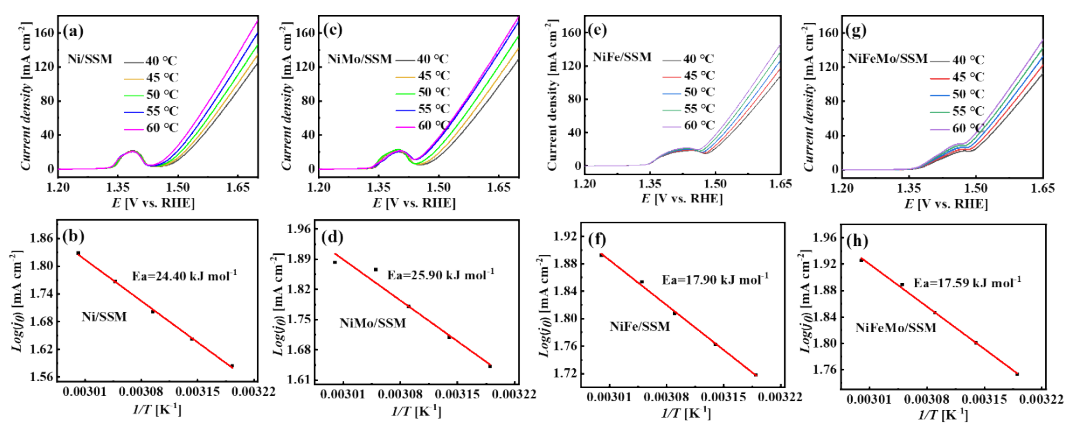

**Fig. S15.** Polarization curve with different temperatures and corresponding Arrhenius plots of Ni/SSM (a and b), NiMo/SSM (c and d), NiFe/SSM (e and f), NiFeMo/SSM (g and h).

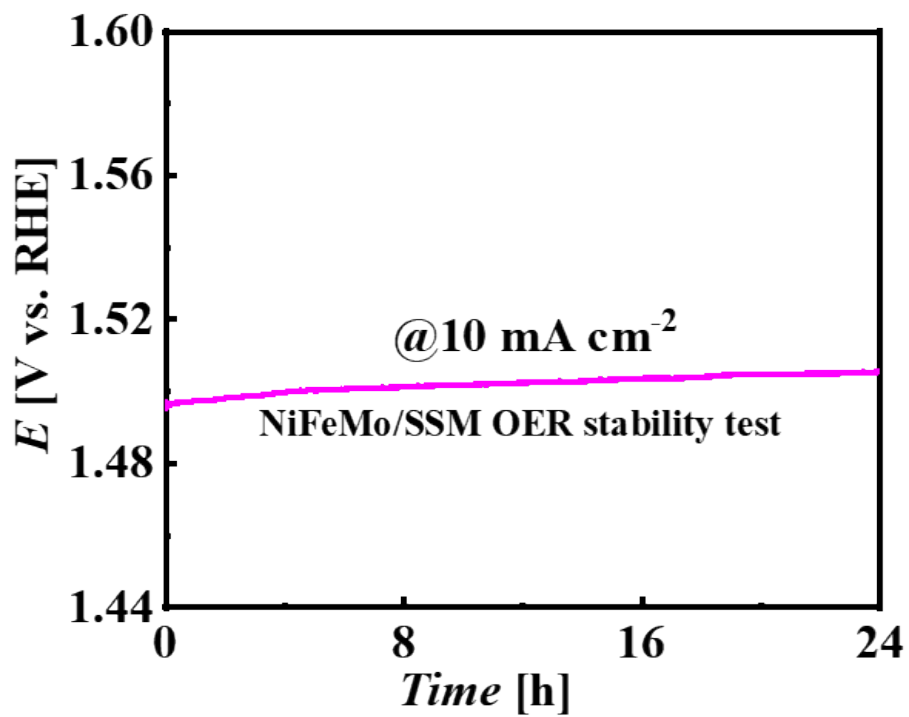

**Fig. S16.** Long stability test curve of NiFeMo/SSM at the current density of 10 mA cm<sup>-2</sup> for 24 h.

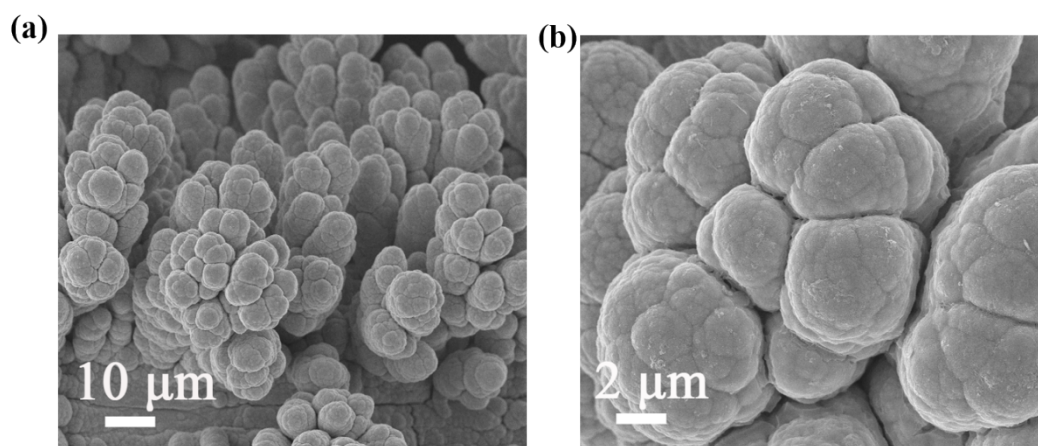

**Fig. S17.** SEM images of NiFeMo/SSM after OER test.

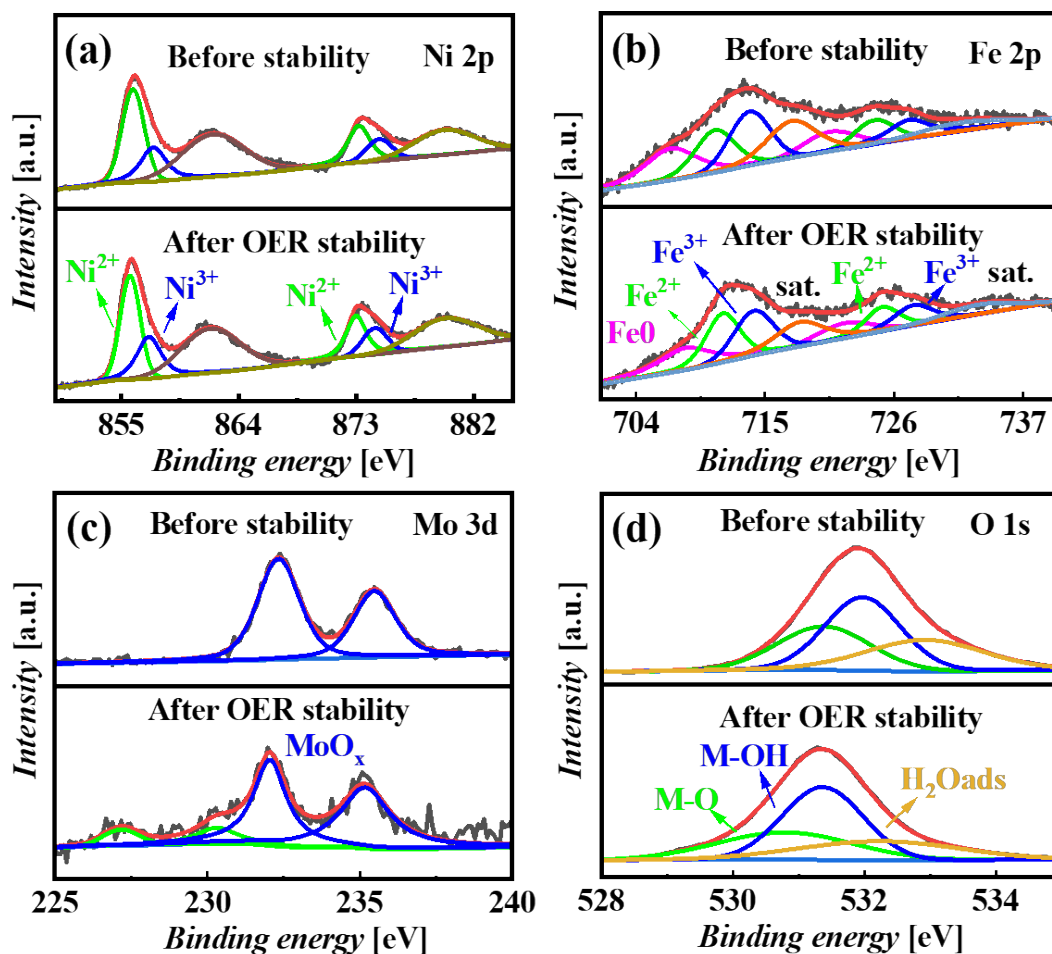

**Fig. S18.** (a) XPS spectra of Ni 2p of NiFeMo/SSM before and after OER stability test. (b) XPS spectra of Fe 2p of NiFeMo/SSM before and after the OER test. (c) XPS spectra of Mo 3d of NiFeMo/SSM before and after the OER test. (d) XPS spectra of O 1s of NiFeMo/SSM before and after the OER test. (top panel for before test, bottom panel for after OER).

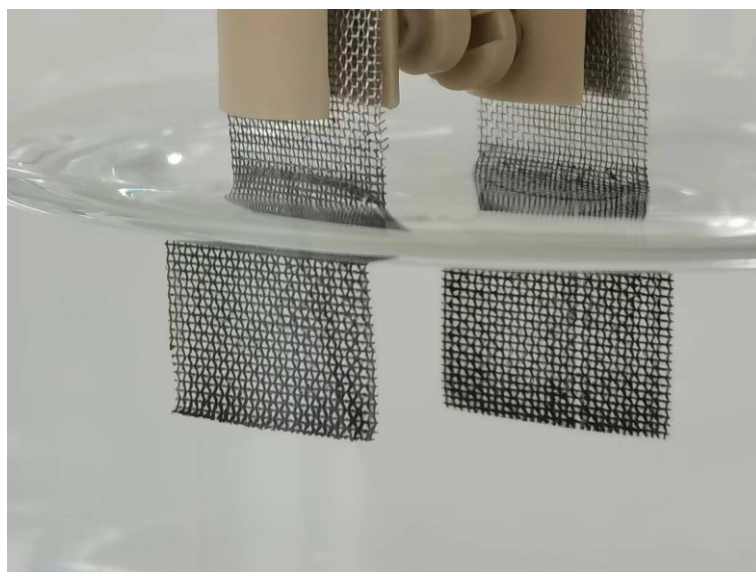

**Fig. S19.** Overall water splitting for a device with NiFeMo/SSM and 1.5V battery.

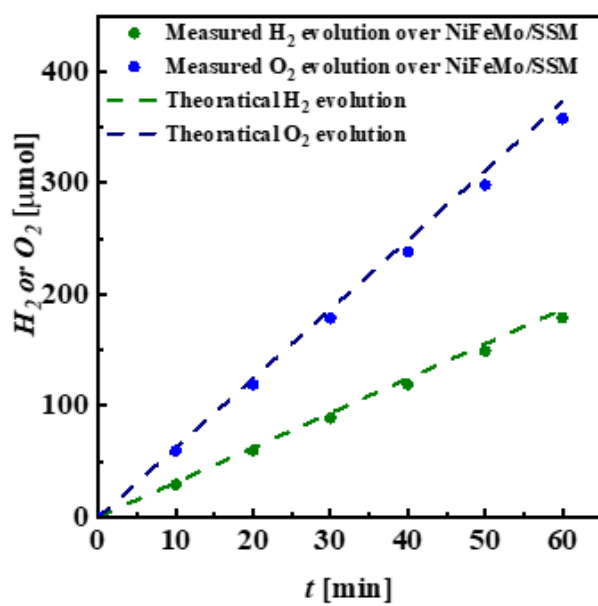

**Fig. S20.** Experimental and theoretical amounts of H<sub>2</sub> and O<sub>2</sub> by the NiFeMo/SSM electrode at a fixed current density of 10 mA cm<sup>-2</sup>.

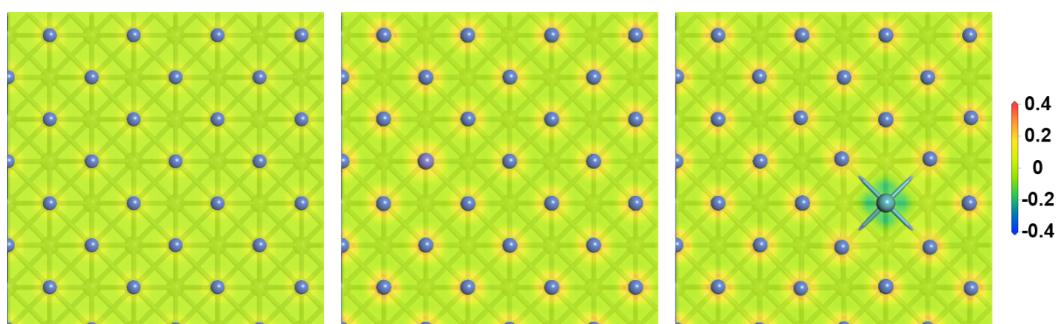

**Fig. S21.** Charge density difference for Ni 、NiFe 、NiMo model.

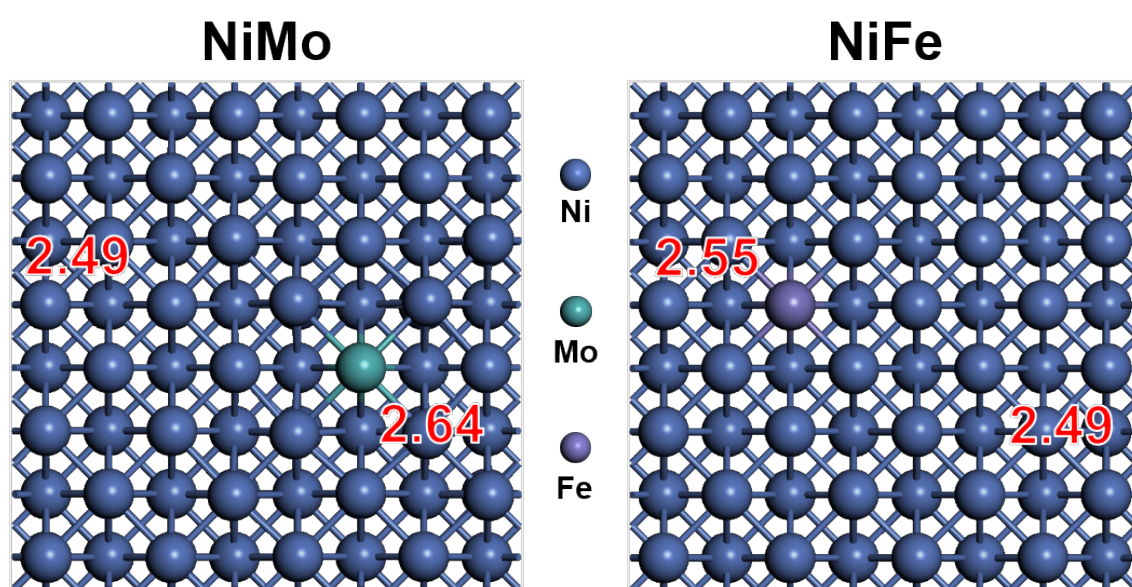

**Fig. S22.** Constructed computational model of NiMo and NiFe.

**Table S2**

Comparison of NiFeMo/SSM with recently reported electrocatalyst literature for HER in alkaline solution.

| Materials                  | Electrolyte      | Overpotential (mV) | J (mA cm <sup>-2</sup> ) | Ref.             |
|----------------------------|------------------|--------------------|--------------------------|------------------|
| <b>NiFeMo/SSM</b>          | <b>1.0 M KOH</b> | <b>86</b>          | <b>10</b>                | <b>This work</b> |
| NiMo                       | 1.0 M KOH        | 58                 | 10                       | 1                |
| FeMo                       | 1.0 M KOH        | 66                 | 10                       | 2                |
| NiMoO <sub>4</sub>         | 1.0 M KOH        | 71                 | 10                       | 3                |
| Ni-Mo-O/Ni <sub>4</sub> Mo | 1.0 M KOH        | 61                 | 10                       | 4                |
| Ni <sub>4</sub> Mo         | 1.0 M KOH        | 86                 | 100                      | 5                |
|                            |                  | 24                 | 10                       |                  |
| Ni/Mo-Ni                   | 1.0 M KOH        | 89                 | 50                       | 6                |
|                            |                  | 159                | 100                      |                  |
| NiMo                       | 1.0 M KOH        | 33                 | 10                       | 7                |
|                            |                  | 267                | 1000                     |                  |
| NiFeMo suboxides           | 1.0 M KOH        | 22                 | 10                       | 8                |
|                            |                  | 117                | 100                      |                  |
| NiFeMo                     | 1.0 M KOH        | 33                 | 10                       | 9                |
|                            |                  | 249                | 500                      |                  |
| NiFeMo                     | 1.0 M KOH        | 84.8               | 10                       | 10               |
| Mo-NiFe <sub>x</sub>       | 1.0 M KOH        | 109.9              | 10                       | 11               |



**Table S3**

Comparison of NiFeMo/SSM with recently reported electrocatalyst literature for OER in alkaline solution.

| Materials                       | Electrolyte      | Overpotential (mV) | J (mA cm <sup>-2</sup> ) | Ref.             |
|---------------------------------|------------------|--------------------|--------------------------|------------------|
| <b>NiFeMo/SSM</b>               | <b>1.0 M KOH</b> | <b>318</b>         | <b>50</b>                | <b>This work</b> |
| MoFe-Ni(OH) <sub>2</sub> /NiOOH | 1.0 M KOH        | 280                | 100                      | 12               |
| NiFeMo                          | 1.0 M KOH        | 230                | 20                       | 13               |
| NiFeMo suboxides                | 1.0 M KOH        | 255                | 10                       | 8                |
|                                 |                  | 289                | 100                      |                  |
| NiFeMo                          | 1.0 M KOH        | 230                | 10                       | 10               |
| Mo-NiFe-LDH                     | 1.0 M KOH        | 317                | 20                       | 14               |
| NiFeMo film                     | 1.0 M KOH        | 306                | 10                       | 15               |
|                                 |                  | 198                | 10                       | 9                |
| NiFeMo                          | 1.0 M KOH        | 293                | 500                      |                  |
|                                 |                  | 240                | 100                      | 11               |
| Mo-NiFe <sub>x</sub>            | 1.0 M KOH        | 240                | 100                      | 11               |
| Mo-NiFe-LDH                     | 1.0 M KOH        | 317                | 20                       | 14               |

## Reference

1. J. Sun, B. Yu, F. Tan, W. Yang, G. Cheng and Z. Zhang, *Int. J. Hydrogen Energy*, 2022, **47**, 15764-15774.
2. W. Chen, G. Qian, Q. Xu, C. Yu, M. Yu, Y. Xia and S. Yin, *Nanoscale*, 2020, **12**, 7116-7123.
3. X. Liu, P. Liu, F. Wang, X. Lv, T. Yang, W. Tian, C. Wang, S. Tan and J. Ji, *ACS Appl Mater Interfaces*, 2021, **13**, 41545-41554.
4. Z. Jin, L. Wang, T. Chen, J. Liang, Q. Zhang, W. Peng, Y. Li, F. Zhang and X. Fan, *Ind. Eng. Chem. Res.*, 2021, **60**, 5145-5150.
5. W. Du, Y. Shi, W. Zhou, Y. Yu and B. Zhang, *Angew Chem Int Ed*, 2021, **60**, 7051-7055.
6. H. Li, C. Cai, Q. Wang, S. Chen, J. Fu, B. Liu, Q. Hu, K. Hu, H. Li, J. Hu, Q. Liu, S. Chen and M. Liu, *Chem. Eng. J.*, 2022, **435**, 134860.
7. G. Qian, J. Chen, T. Yu, J. Liu, L. Luo and S. Yin, *Nanomicro Lett*, 2021, **14**, 00744.
8. Y. K. Li, G. Zhang, W. T. Lu and F. F. Cao, *Adv Sci.*, 2020, **7**, 1902034.
9. C.-T. Hsieh, C.-L. Huang, Y.-A. Chen and S.-Y. Lu, *Appl. Catal., B*, 2020, **267**, 118376.
10. Z. Lv, Z. Li, X. Tan, Z. Li, R. Wang, M. Wen, X. Liu, G. Wang, G. Xie and L. Jiang, *Appl. Surf. Sci.*, 2021, **552**, 149514.
11. W. Chen, J. Zeng, G. Zhang, J. Yu and Y. Qiu, *Int. J. Hydrogen Energy*, 2022, **47**, 13850-13861.
12. Y. Jin, S. Huang, X. Yue, H. Du and P. K. Shen, *ACS Catal.*, 2018, **8**, 2359-2363.
13. X. Su, Q. Sun, J. Bai, Z. Wang and C. Zhao, *Electrochim. Acta*, 2018, **260**, 477-482.
14. Z. Yin, X. Liu, M. Cui, Z. Cao, A. Liu, L. Gao, T. Ma, S. Chen and Y. Li, *Mater. Today Sustain.*, 2022, **17**, 100101.
15. Y. Huang, Y. Wu, Z. Zhang, L. Yang and Q. Zang, *Electrochim. Acta*, 2021, **390**, 138754.
